# Supplementary material for: Porous WO3–carbon nanofibers: high-performance and recyclable visible light photocatalysis
Source: Royal Society of Chemistry journal article supplement (doi:10.1039/c4cy00777h), 2014-01-01
Supplement: c4cy00777h1.pdf [file c4cy00777h1.pdf]

**Electronic Supplementary Information (ESI)**

**Porous WO<sub>3</sub>-Carbon nanofiber: High-Performance and Recyclable Visible-Light Photocatalysis**

*Ahmed Aboueloyoun Taha Hriez<sup>a,b\*</sup>, Fengting Li<sup>a</sup>*

<sup>a</sup>College of Environmental Science and Engineering, UNEP TONGJI Institute of Environment for Sustainable Development, State Key Laboratory of Pollution Control and Resource Reuse Study, Tongji University, Siping Rd 1239, Shanghai, 200092, China

<sup>b</sup>Soils, Water and Environment Research Institute (SWERI), Agricultural Research Center (ARC), Giza 12112, Egypt

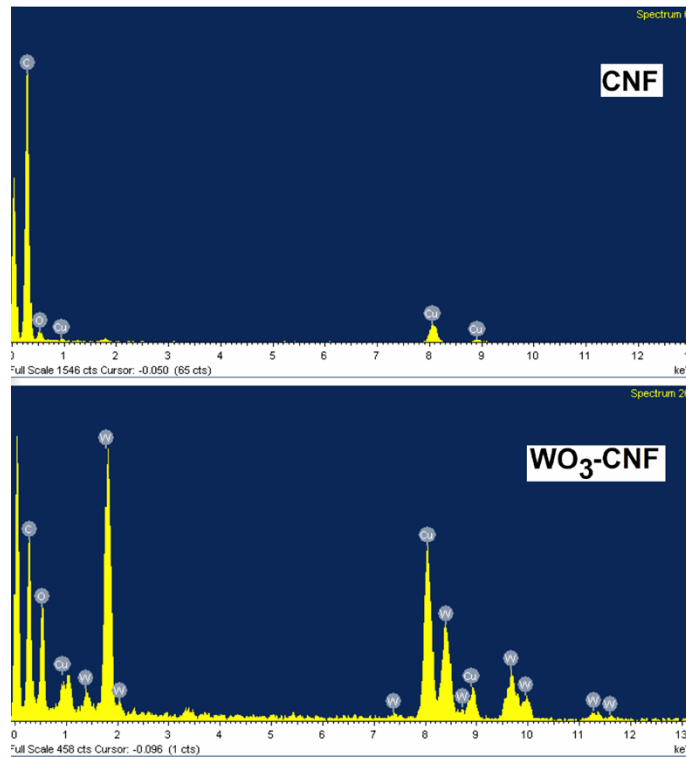

Fig. 1S. DES analysis of CNF and WO<sub>3</sub>-CNF

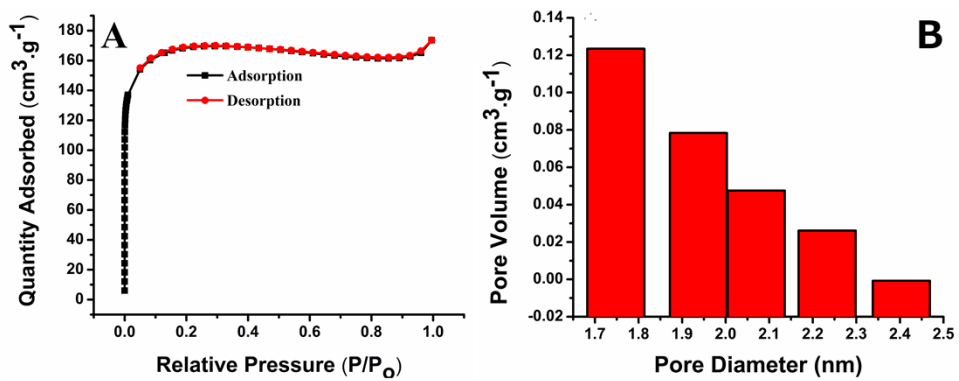

Fig. 2S. (A) N<sub>2</sub> adsorption–desorption isotherms and (B) the corresponding pore size distribution of the sample of WO<sub>3</sub>-MCNF composite membrane.
